# Supplementary material for: Advancing understanding of actinide(iii) (Ac, Am, Cm) aqueous complexation chemistry
Source: PubMed Central journal article supplement (PMC8179631; doi:10.1039/d1sc00233c), 2021-03-17
Supplement: SC-012-D1SC00233C-s001.pdf [file SC-012-D1SC00233C-s001.pdf]

## Supporting information

### Advancing Understanding of Actinide(III) (Ac, Am, Cm) Aqueous Complexation Chemistry

Zachary R. Jones,<sup>1</sup> Maksim Y. Livshits,<sup>1</sup> Frankie D. White,<sup>1</sup> Elodie Dalodière,<sup>1</sup> Maryline G. Ferrier,<sup>1</sup> Laura M. Lilley,<sup>1</sup> Karah E. Knope,<sup>2</sup> Stosh A. Kozimor,<sup>1,\*</sup> Veronika Mocko,<sup>1</sup> Brian L. Scott,<sup>1</sup> Benjamin W. Stein,<sup>1,\*</sup> Jennifer N. Wacker,<sup>1,2</sup> David H. Woen.<sup>1</sup>

<sup>1</sup> Los Alamos National Laboratory (LANL), P.O. Box 1663, Los Alamos, New Mexico, 87545, USA

<sup>2</sup> Department of Chemistry, Georgetown University, 37th and O Streets NW, Washington, D.C. 20057, USA

\* To whom correspondence should be directed, *e-mail*; [stosh@lanl.gov](mailto:stosh@lanl.gov),  
[bstein@lanl.gov](mailto:bstein@lanl.gov)

---

|                 | <b>Table of Contents</b>                                                                       | <b>Page</b> |
|-----------------|------------------------------------------------------------------------------------------------|-------------|
| <b>Fig. S1</b>  | Previously published Ac-aquo L <sub>3</sub> -edge XANES                                        | 3           |
| <b>Fig. S2</b>  | Previously published Ac-aquo ion L <sub>3</sub> -edge XANES with I <sub>0</sub>                | 4           |
| <b>Fig. S3</b>  | Solid-state structure of <b>(NH<sub>4</sub>)<sub>2</sub>Eu(O<sub>2</sub>CMe)<sub>5</sub></b>   | 5           |
| <b>Table S1</b> | Crystal structure data for <b>(NH<sub>4</sub>)<sub>2</sub>Eu(O<sub>2</sub>CMe)<sub>5</sub></b> | 6           |
| <b>Fig. S4</b>  | Solid-state structure of <b>(NH<sub>4</sub>)<sub>2</sub>Am(O<sub>2</sub>CMe)<sub>5</sub></b>   | 7           |
| <b>Table S2</b> | Crystal structure data for <b>(NH<sub>4</sub>)<sub>2</sub>Am(O<sub>2</sub>CMe)<sub>5</sub></b> | 8           |
| <b>Fig. S5</b>  | Solid-state structure of <b>(NH<sub>4</sub>)<sub>2</sub>Cm(O<sub>2</sub>CMe)<sub>5</sub></b>   | 9           |
| <b>Table S3</b> | Crystal structure data for <b>(NH<sub>4</sub>)<sub>2</sub>Cm(O<sub>2</sub>CMe)<sub>5</sub></b> | 10          |
| <b>Table S4</b> | Tabulated Data for Figs <b>S1</b> and <b>S2</b>                                                | 11          |

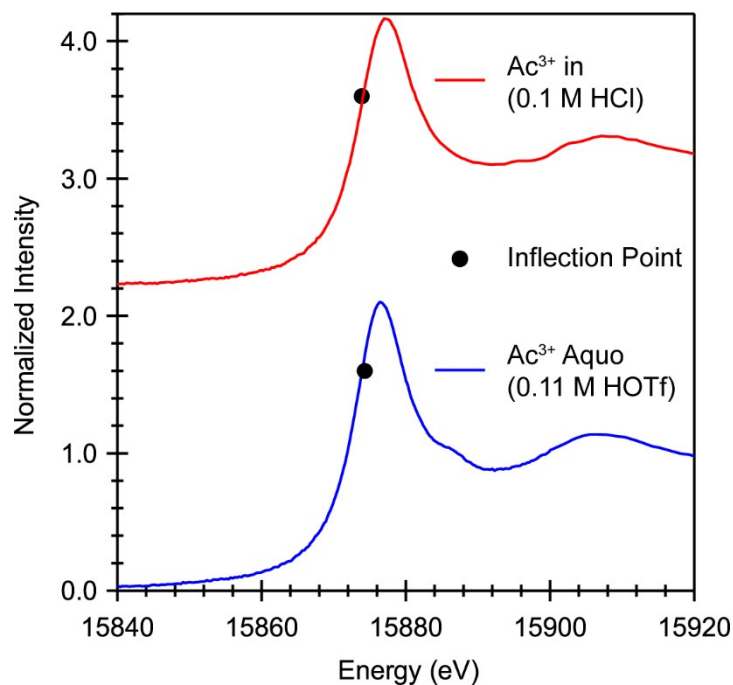

**Fig. S1** Actinium L<sub>3</sub>-edge X-ray absorption spectra from (blue) Ac<sup>3+</sup>-aquo in 0.11 M HOTf (data published in reference Ferrier, *et al. Nature Comm.* **2016**, 7, 12312), and (red) Ac<sup>3+</sup> in 0.1 M HCl (data published in reference Ferrier, *et al. ACS Central Sci.* **2017**, 3, 176). Note, there is an I0 glitch near 15886 in the Ac<sup>3+</sup>-aquo in 0.11 M HOTf data.

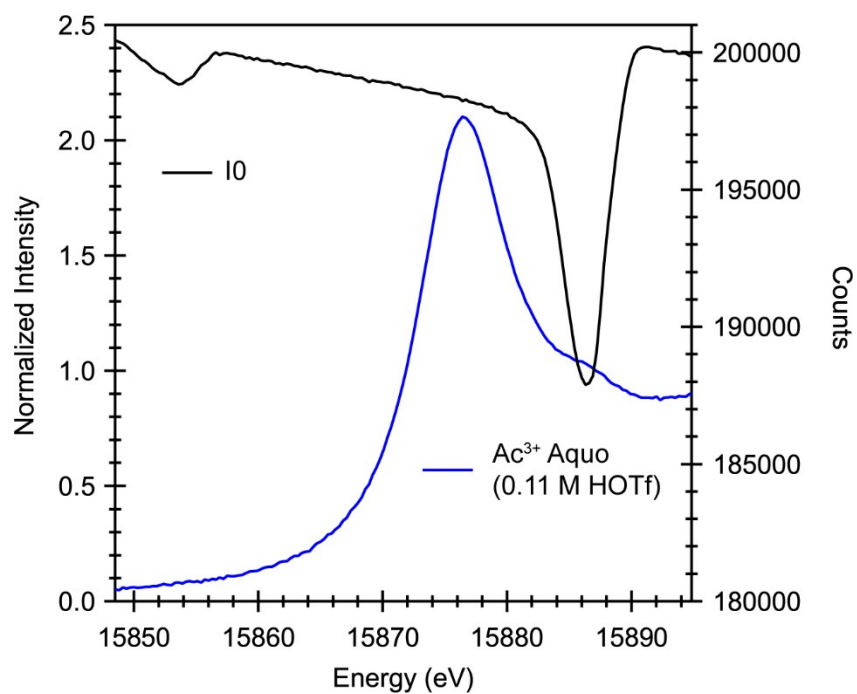

**Fig. S2** Actinium L<sub>3</sub>-edge X-ray absorption spectra from (blue) Ac<sup>3+</sup>-aquo in 0.11 M HOTf (data published in reference Ferrier, *et al. Nature Comm.* **2016**, *7*, 12312), and the counts corresponding to the incident beam (*I*<sub>0</sub>) highlighting the dip in intensity resulting from the monochromator crystal glitch around 15886 eV.

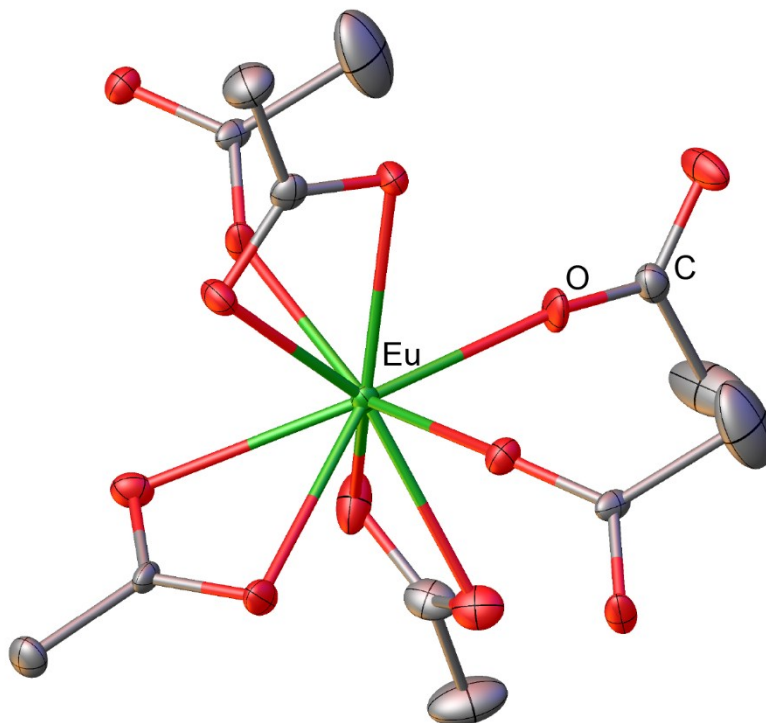

**Fig. S3** A thermal ellipsoid plot generated from the single crystal X-ray diffraction data of  $(\text{NH}_4)_2\text{Eu}(\text{O}_2\text{CMe})_5$  (green = Eu, red = O, gray = C). The thermal ellipsoids have been plotted at the 50% probability. Hydrogen atoms and the  $\text{NH}_4^{1+}$  cations have been omitted.

**Table S1 Crystal data for (NH<sub>4</sub>)<sub>2</sub>Eu(O<sub>2</sub>CMe)<sub>5</sub>.**

|                                                              |                                                                              |
|--------------------------------------------------------------|------------------------------------------------------------------------------|
| Identification code                                          | CCDC#2016263                                                                 |
| Empirical formula                                            | EuO <sub>11</sub> N <sub>2</sub> C <sub>10</sub> H <sub>17</sub>             |
| Formula weight                                               | 493.22                                                                       |
| Temperature/K                                                | 296.15                                                                       |
| Crystal system                                               | monoclinic                                                                   |
| Space group                                                  | <i>P</i> 2 <sub>1</sub> / <i>n</i>                                           |
| <i>a</i> /Å                                                  | 6.7137(4)                                                                    |
| <i>b</i> /Å                                                  | 14.8928(8)                                                                   |
| <i>c</i> /Å                                                  | 20.2772(12)                                                                  |
| $\alpha$ /°                                                  | 90                                                                           |
| $\beta$ /°                                                   | 97.157(3)                                                                    |
| $\gamma$ /°                                                  | 90                                                                           |
| Volume/Å <sup>3</sup>                                        | 2011.6(2)                                                                    |
| <i>Z</i>                                                     | 4                                                                            |
| $\rho_{\text{calc}}$ /g/cm <sup>3</sup>                      | 1.629                                                                        |
| $\mu$ /mm <sup>-1</sup>                                      | 3.166                                                                        |
| <i>F</i> (000)                                               | 968.0                                                                        |
| Crystal size/mm <sup>3</sup>                                 | 0.75 × 0.30 × 0.30                                                           |
| Radiation                                                    | MoK $\alpha$ ( $\lambda$ = 0.71073)                                          |
| 2 $\Theta$ range for data collection/°                       | 3.402 to 56.426                                                              |
| Index ranges                                                 | -8 ≤ <i>h</i> ≤ 8, -19 ≤ <i>k</i> ≤ 19, -26 ≤ <i>l</i> ≤ 26                  |
| Reflections collected                                        | 63722                                                                        |
| Independent reflections                                      | 4950 [ <i>R</i> <sub>int</sub> = 0.0898, <i>R</i> <sub>sigma</sub> = 0.0533] |
| Data/restraints/parameters                                   | 4950/0/225                                                                   |
| Goodness-of-fit on <i>F</i> <sup>2</sup>                     | 1.181                                                                        |
| Final <i>R</i> indexes [ <i>I</i> ≥ 2 $\sigma$ ( <i>I</i> )] | <i>R</i> <sub>1</sub> = 0.0584, <i>wR</i> <sub>2</sub> = 0.1198              |
| Final <i>R</i> indexes [all data]                            | <i>R</i> <sub>1</sub> = 0.0716, <i>wR</i> <sub>2</sub> = 0.1241              |
| Largest diff. peak/hole / e Å <sup>-3</sup>                  | 2.16/-2.54                                                                   |

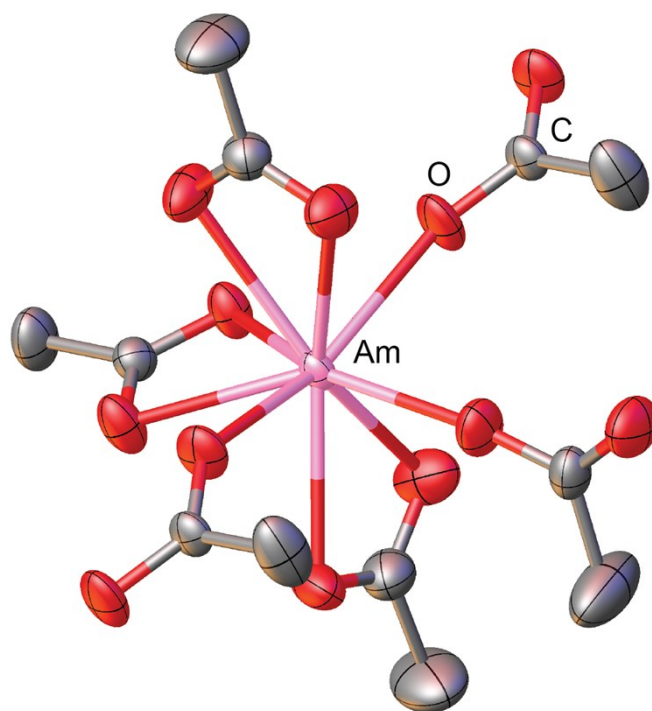

**Fig. S4** A thermal ellipsoid plot generated from the single crystal X-ray diffraction data of  $(\text{NH}_4)_2\text{Am}(\text{O}_2\text{CMe})_5$  (pink = Am, red = O, gray = C). The thermal ellipsoids have been plotted at the 50% probability. Hydrogen atoms and the  $\text{NH}_4^{1+}$  cations have been omitted.

**Table S2 Crystal data for (NH<sub>4</sub>)<sub>2</sub>Am(O<sub>2</sub>CMe)<sub>5</sub>.**

|                                                              |                                                                              |
|--------------------------------------------------------------|------------------------------------------------------------------------------|
| Identification code                                          | CCDC#2016262                                                                 |
| Empirical formula                                            | AmO <sub>11</sub> N <sub>2</sub> C <sub>10</sub> H <sub>17</sub>             |
| Formula weight                                               | 582.52                                                                       |
| Temperature/K                                                | 298.39                                                                       |
| Crystal system                                               | monoclinic                                                                   |
| Space group                                                  | <i>P</i> 2 <sub>1</sub> / <i>n</i>                                           |
| <i>a</i> /Å                                                  | 6.7963(3)                                                                    |
| <i>b</i> /Å                                                  | 15.0543(8)                                                                   |
| <i>c</i> /Å                                                  | 20.4812(11)                                                                  |
| $\alpha$ /°                                                  | 90                                                                           |
| $\beta$ /°                                                   | 97.2970(10)                                                                  |
| $\gamma$ /°                                                  | 90                                                                           |
| Volume/Å <sup>3</sup>                                        | 2078.53(18)                                                                  |
| <i>Z</i>                                                     | 4                                                                            |
| $\rho_{\text{calc}}$ /cm <sup>3</sup>                        | 1.884                                                                        |
| $\mu$ /mm <sup>-1</sup>                                      | 3.739                                                                        |
| <i>F</i> (000)                                               | 1219.0                                                                       |
| Crystal size/mm <sup>3</sup>                                 | 0.8 × 0.3 × 0.3                                                              |
| Radiation                                                    | MoK $\alpha$ ( $\lambda$ = 0.71073)                                          |
| 2 $\Theta$ range for data collection/°                       | 5.412 to 67.466                                                              |
| Index ranges                                                 | -10 ≤ <i>h</i> ≤ 10, -23 ≤ <i>k</i> ≤ 23, -31 ≤ <i>l</i> ≤ 31                |
| Reflections collected                                        | 47585                                                                        |
| Independent reflections                                      | 8271 [ <i>R</i> <sub>int</sub> = 0.0382, <i>R</i> <sub>sigma</sub> = 0.0250] |
| Data/restraints/parameters                                   | 8271/0/225                                                                   |
| Goodness-of-fit on <i>F</i> <sup>2</sup>                     | 1.090                                                                        |
| Final <i>R</i> indexes [ <i>I</i> ≥ 2 $\sigma$ ( <i>I</i> )] | <i>R</i> <sub>1</sub> = 0.0284, <i>wR</i> <sub>2</sub> = 0.0719              |
| Final <i>R</i> indexes [all data]                            | <i>R</i> <sub>1</sub> = 0.0367, <i>wR</i> <sub>2</sub> = 0.0749              |
| Largest diff. peak/hole / e Å <sup>-3</sup>                  | 2.37/-0.87                                                                   |



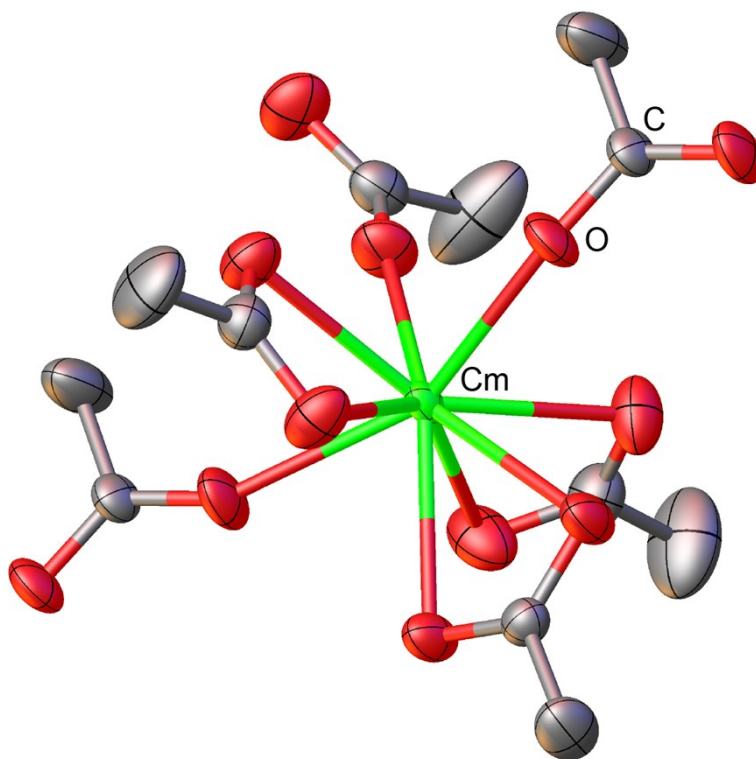

**Fig. S5** A thermal ellipsoid plot generated from the single crystal X-ray diffraction data of  $(\text{NH}_4)_2\text{Cm}(\text{O}_2\text{CMe})_5$  (green = Cm, red = O, gray = C). The thermal ellipsoids have been plotted at the 50% probability. Hydrogen atoms and the  $\text{NH}_4^{1+}$  cations have been omitted.

**Table S3 Crystal data for (NH<sub>4</sub>)<sub>2</sub>Cm(O<sub>2</sub>CMe)<sub>5</sub>.**

|                                                              |                                                                              |
|--------------------------------------------------------------|------------------------------------------------------------------------------|
| Identification code                                          | CCDC#2016265                                                                 |
| Empirical formula                                            | CmO <sub>11</sub> N <sub>2</sub> C <sub>10</sub> H <sub>25</sub>             |
| Formula weight                                               | 593.51                                                                       |
| Temperature/K                                                | 298.06                                                                       |
| Crystal system                                               | monoclinic                                                                   |
| Space group                                                  | <i>P</i> 2 <sub>1</sub> / <i>n</i>                                           |
| <i>a</i> /Å                                                  | 6.7801(3)                                                                    |
| <i>b</i> /Å                                                  | 15.0056(7)                                                                   |
| <i>c</i> /Å                                                  | 20.4890(10)                                                                  |
| $\alpha$ /°                                                  | 90                                                                           |
| $\beta$ /°                                                   | 97.2400(10)                                                                  |
| $\gamma$ /°                                                  | 90                                                                           |
| Volume/Å <sup>3</sup>                                        | 2067.92(17)                                                                  |
| <i>Z</i>                                                     | 4                                                                            |
| $\rho_{\text{calc}}$ /g/cm <sup>3</sup>                      | 1.880                                                                        |
| $\mu$ /mm <sup>-1</sup>                                      | 3.989                                                                        |
| <i>F</i> (000)                                               | 1100.0                                                                       |
| Crystal size/mm <sup>3</sup>                                 | 0.2 × 0.15 × 0.1                                                             |
| Radiation                                                    | MoK $\alpha$ ( $\lambda$ = 0.71073)                                          |
| 2 $\Theta$ range for data collection/°                       | 5.43 to 56.542                                                               |
| Index ranges                                                 | -9 ≤ <i>h</i> ≤ 9, -19 ≤ <i>k</i> ≤ 20, -27 ≤ <i>l</i> ≤ 27                  |
| Reflections collected                                        | 32150                                                                        |
| Independent reflections                                      | 5093 [ <i>R</i> <sub>int</sub> = 0.0321, <i>R</i> <sub>sigma</sub> = 0.0193] |
| Data/restraints/parameters                                   | 5093/0/225                                                                   |
| Goodness-of-fit on <i>F</i> <sup>2</sup>                     | 1.171                                                                        |
| Final <i>R</i> indexes [ <i>I</i> ≥ 2 $\sigma$ ( <i>I</i> )] | <i>R</i> <sub>1</sub> = 0.0252, <i>wR</i> <sub>2</sub> = 0.0638              |
| Final <i>R</i> indexes [all data]                            | <i>R</i> <sub>1</sub> = 0.0289, <i>wR</i> <sub>2</sub> = 0.0652              |
| Largest diff. peak/hole / e Å <sup>-3</sup>                  | 1.82/-0.73                                                                   |

**Table S4** Tabulated Data from Fig. S1-S2.

| Energy (eV) | Ac in 0.11 M HOTf | IO Ac in 0.11 M HOTf | Energy (eV) Ac in 0.1 M HCl | Ac in 0.1 M HCl |
|-------------|-------------------|----------------------|-----------------------------|-----------------|
| 15639.8     | 0.0126594         | 205884               | 15468.1                     | 0.0280115       |
| 15645.7     | 0.00481276        | 205890               | 15473.9                     | 0.0257753       |
| 15651.6     | 0.00293112        | 205746               | 15479.8                     | 0.0243976       |
| 15657.4     | 0.00391762        | 205510               | 15485.7                     | 0.0287314       |
| 15663.3     | -0.00470631       | 205356               | 15491.6                     | 0.0273089       |
| 15669.2     | 0.00964801        | 205144               | 15497.5                     | 0.0242683       |
| 15675.1     | 0.000913579       | 205428               | 15503.4                     | 0.0167116       |
| 15681       | 0.00604719        | 206384               | 15509.2                     | 0.0287685       |
| -           | -                 | -                    | -                           | -               |
| 15686.9     | 0.000612236       | 206350               | 15515.1                     | 0.0198663       |
| 15692.8     | -0.00643875       | 206404               | 15521                       | 0.0198588       |
| 15698.6     | -0.00285543       | 206066               | 15526.9                     | 0.0158353       |
| 15704.5     | -0.0027566        | 205908               | 15532.8                     | 0.0153119       |
| -           | -                 | -                    | -                           | -               |
| 15710.4     | 0.000259465       | 205798               | 15538.6                     | 0.0145092       |
| 15716.3     | -0.00184415       | 205582               | 15544.5                     | 0.0131751       |
| -           | -                 | -                    | -                           | -               |
| 15722.2     | 0.000569398       | 205354               | 15550.4                     | 0.0074762       |
| 15728       | -0.00572285       | 205124               | 15556.3                     | 0.0137902       |
| 15733.9     | -0.00503089       | 204926               | 15562.2                     | 0.0151856       |
| 15739.8     | -0.00313219       | 204676               | 15568.1                     | 0.00872356      |
| 15745.7     | 0.000627347       | 204494               | 15573.9                     | 0.013068        |
| 15751.6     | -0.00114518       | 204278               | 15579.8                     | 0.00603819      |
| -           | -                 | -                    | -                           | -               |
| 15757.5     | 0.000936867       | 203726               | 15585.7                     | 0.00417161      |
| 15763.4     | 0.000531133       | 202654               | 15591.6                     | 0.00364567      |
| 15769.2     | -0.00657201       | 203868               | 15597.5                     | -0.00347261     |
| 15775.1     | -0.00067204       | 203590               | 15603.3                     | 0.00773537      |
| 15781       | 0.000754353       | 203280               | 15609.2                     | 0.00527484      |
| -           | -                 | -                    | -                           | -               |
| 15786.9     | 0.000215482       | 202874               | 15615.1                     | 8.90E-05        |
| 15792.8     | -0.00571025       | 202888               | 15621                       | -0.00272823     |
| 15798.6     | -0.00249775       | 202568               | 15626.9                     | 0.00228277      |
| 15804.5     | -0.00618105       | 202310               | 15632.7                     | 0.00289531      |
| 15810.4     | 0.00419742        | 201754               | 15638.6                     | -0.00231464     |
| 15816.3     | 0.0185135         | 199924               | 15644.5                     | -0.00246372     |
| 15822.2     | 0.00496486        | 201930               | 15650.4                     | -0.0066682      |
| 15828       | 0.0123571         | 201656               | 15656.3                     | -0.00109702     |
| 15833.9     | 0.0143548         | 201424               | 15662.2                     | -0.00561189     |
| 15839.8     | 0.0287937         | 201242               | 15668.1                     | 0.00614525      |
| 15840.1     | 0.0350835         | 201194               | 15673.9                     | -0.00276673     |
| 15840.4     | 0.0262433         | 201166               | 15679.8                     | -0.00166585     |

|         |           |        |         |             |
|---------|-----------|--------|---------|-------------|
| 15840.7 | 0.033519  | 201170 | 15685.7 | 0.000359505 |
| 15841   | 0.0321804 | 201088 | 15691.6 | -0.00739965 |
| 15841.3 | 0.0334317 | 201086 | 15697.5 | -0.00164293 |
| 15841.6 | 0.0298871 | 201090 | 15703.3 | -0.00680217 |
| 15841.9 | 0.0324995 | 201092 | 15709.2 | -0.0169073  |
| 15842.2 | 0.0307326 | 201040 | 15715.1 | -0.00662214 |
| 15842.5 | 0.0346181 | 200996 | 15721   | -0.00576578 |
| 15842.8 | 0.0351884 | 200944 | 15726.9 | -0.00506288 |
| 15843.1 | 0.0360807 | 200944 | 15732.8 | -0.00651774 |
| 15843.4 | 0.0325074 | 200962 | 15738.6 | -0.00339055 |
| 15843.7 | 0.0343292 | 200912 | 15744.5 | -0.00990206 |
| 15844   | 0.0324456 | 200846 | 15750.4 | -0.00298591 |
| 15844.3 | 0.0351814 | 200840 | 15756.3 | -0.00863513 |
| 15844.6 | 0.038761  | 200814 | 15762.2 | -0.00378094 |
| 15844.9 | 0.041125  | 200828 | 15768   | 0.0193095   |
| 15845.2 | 0.0413241 | 200780 | 15773.9 | 0.000549167 |
| 15845.5 | 0.0390011 | 200726 | 15779.8 | 0.0081511   |
| 15845.8 | 0.0399841 | 200734 | 15785.7 | -0.003674   |
| 15846.1 | 0.0426367 | 200696 | 15791.6 | 0.00188742  |
| 15846.4 | 0.0419536 | 200670 | 15797.5 | 0.0122413   |
| 15846.7 | 0.042659  | 200666 | 15803.4 | 0.0101687   |
| 15847   | 0.0459799 | 200592 | 15809.2 | 0.0138654   |
| 15847.3 | 0.0455923 | 200554 | 15815.1 | 0.00888503  |
| 15847.6 | 0.0450908 | 200542 | 15821   | 0.0100847   |
| 15847.9 | 0.0481306 | 200528 | 15826.9 | 0.0153131   |
| 15848.2 | 0.0518224 | 200492 | 15832.8 | 0.0210864   |
| 15848.5 | 0.0499187 | 200446 | 15838.6 | 0.0284977   |
| 15848.8 | 0.0478625 | 200386 | 15840.7 | 0.0337186   |
| 15849.1 | 0.0598929 | 200332 | 15841   | 0.031214    |
| 15849.4 | 0.0550663 | 200238 | 15841.3 | 0.0411536   |
| 15849.7 | 0.0590884 | 200084 | 15841.6 | 0.0386242   |
| 15850   | 0.0606455 | 200006 | 15841.9 | 0.0365497   |
| 15850.3 | 0.0574271 | 199868 | 15842.2 | 0.0351426   |
| 15850.6 | 0.0593213 | 199734 | 15842.5 | 0.0399344   |
| 15850.9 | 0.0618487 | 199676 | 15842.8 | 0.0361818   |
| 15851.2 | 0.0617253 | 199564 | 15843.1 | 0.0443016   |
| 15851.5 | 0.0647897 | 199436 | 15843.4 | 0.0397675   |
| 15851.8 | 0.065003  | 199324 | 15843.7 | 0.0358892   |
| 15852.1 | 0.0692603 | 199250 | 15844   | 0.033638    |
| 15852.4 | 0.0756715 | 199210 | 15844.3 | 0.0378372   |
| 15852.7 | 0.0712329 | 199088 | 15844.6 | 0.0395382   |
| 15853   | 0.0696652 | 198988 | 15844.9 | 0.0362235   |
| 15853.3 | 0.0793431 | 198902 | 15845.2 | 0.0419712   |
| 15853.6 | 0.0809613 | 198838 | 15845.5 | 0.0335645   |
| 15853.9 | 0.0766655 | 198862 | 15845.8 | 0.0412962   |

|         |           |        |         |           |
|---------|-----------|--------|---------|-----------|
| 15854.2 | 0.0850523 | 198970 | 15846.1 | 0.0444032 |
| 15854.5 | 0.0864692 | 199044 | 15846.4 | 0.0424626 |
| 15854.8 | 0.0836983 | 199142 | 15846.7 | 0.0466488 |
| 15855.1 | 0.0874202 | 199344 | 15847   | 0.0466094 |
| 15855.4 | 0.0815718 | 199528 | 15847.3 | 0.0463275 |
| 15855.7 | 0.0940168 | 199612 | 15847.6 | 0.0435886 |
| 15856   | 0.0897654 | 199724 | 15847.9 | 0.0466073 |
| 15856.3 | 0.0969161 | 199916 | 15848.2 | 0.0484148 |
| 15856.6 | 0.0943065 | 200006 | 15848.5 | 0.0505855 |
| 15856.9 | 0.102414  | 199908 | 15848.8 | 0.0514754 |
| 15857.2 | 0.0970226 | 199964 | 15849.1 | 0.0526512 |
| 15857.5 | 0.109499  | 199984 | 15849.4 | 0.0573768 |
| 15857.8 | 0.108976  | 199944 | 15849.7 | 0.0599668 |
| 15858.1 | 0.108153  | 199936 | 15850   | 0.0508181 |
| 15858.4 | 0.111153  | 199888 | 15850.3 | 0.060041  |
| 15858.7 | 0.114784  | 199870 | 15850.6 | 0.0566239 |
| 15859   | 0.122016  | 199782 | 15850.9 | 0.0583246 |
| 15859.3 | 0.128439  | 199820 | 15851.2 | 0.0631622 |
| 15859.6 | 0.129944  | 199736 | 15851.5 | 0.0629153 |
| 15859.9 | 0.131463  | 199790 | 15851.8 | 0.0659492 |
| 15860.2 | 0.138984  | 199718 | 15852.1 | 0.0684281 |
| 15860.5 | 0.14614   | 199694 | 15852.4 | 0.0723319 |
| 15860.8 | 0.148516  | 199702 | 15852.7 | 0.0667279 |
| 15861.1 | 0.149521  | 199674 | 15853   | 0.0753973 |
| 15861.4 | 0.158366  | 199588 | 15853.3 | 0.0759678 |
| 15861.7 | 0.169973  | 199608 | 15853.6 | 0.0731349 |
| 15862   | 0.172662  | 199554 | 15853.9 | 0.0708082 |
| 15862.3 | 0.17343   | 199594 | 15854.2 | 0.0769522 |
| 15862.6 | 0.186281  | 199564 | 15854.5 | 0.0746202 |
| 15862.9 | 0.196255  | 199506 | 15854.8 | 0.0758578 |
| 15863.2 | 0.197273  | 199492 | 15855.1 | 0.0838833 |
| 15863.5 | 0.209632  | 199454 | 15855.4 | 0.0767696 |
| 15863.8 | 0.214464  | 199486 | 15855.7 | 0.0839277 |
| 15864.1 | 0.217405  | 199432 | 15856   | 0.0862966 |
| 15864.4 | 0.234542  | 199390 | 15856.3 | 0.0869713 |
| 15864.7 | 0.250538  | 199312 | 15856.6 | 0.0899408 |
| 15865   | 0.25726   | 199348 | 15856.9 | 0.0994507 |
| 15865.3 | 0.270812  | 199314 | 15857.2 | 0.105502  |
| 15865.6 | 0.288924  | 199284 | 15857.5 | 0.0999928 |
| 15865.9 | 0.293817  | 199276 | 15857.8 | 0.0998267 |
| 15866.2 | 0.31064   | 199214 | 15858.1 | 0.107856  |
| 15866.5 | 0.324065  | 199232 | 15858.4 | 0.111466  |
| 15866.8 | 0.348751  | 199170 | 15858.7 | 0.114771  |
| 15867.1 | 0.361136  | 199152 | 15859   | 0.116941  |
| 15867.4 | 0.391885  | 199152 | 15859.3 | 0.118639  |

|         |          |        |         |          |
|---------|----------|--------|---------|----------|
| 15867.7 | 0.407793 | 199090 | 15859.6 | 0.125643 |
| 15868   | 0.427255 | 199064 | 15859.9 | 0.13425  |
| 15868.3 | 0.450301 | 199082 | 15860.2 | 0.128933 |
| 15868.6 | 0.485627 | 199002 | 15860.5 | 0.13758  |
| 15868.9 | 0.506693 | 198920 | 15860.8 | 0.138889 |
| 15869.2 | 0.548174 | 198982 | 15861.1 | 0.139202 |
| 15869.5 | 0.578533 | 198946 | 15861.4 | 0.151962 |
| 15869.8 | 0.61914  | 198932 | 15861.7 | 0.149991 |
| 15870.1 | 0.662882 | 198898 | 15862   | 0.160156 |
| 15870.4 | 0.712972 | 198906 | 15862.3 | 0.165042 |
| 15870.7 | 0.75748  | 198880 | 15862.6 | 0.162576 |
| 15871   | 0.818098 | 198820 | 15862.9 | 0.173553 |
| 15871.3 | 0.874722 | 198838 | 15863.2 | 0.179837 |
| 15871.6 | 0.93894  | 198728 | 15863.5 | 0.191026 |
| 15871.9 | 1.0059   | 198728 | 15863.8 | 0.201291 |
| 15872.2 | 1.09132  | 198708 | 15864.1 | 0.212892 |
| 15872.5 | 1.17238  | 198670 | 15864.4 | 0.218812 |
| 15872.8 | 1.26054  | 198628 | 15864.7 | 0.225603 |
| 15873.1 | 1.34927  | 198656 | 15865   | 0.242186 |
| 15873.4 | 1.44096  | 198600 | 15865.3 | 0.247344 |
| 15873.7 | 1.52676  | 198542 | 15865.6 | 0.253579 |
| 15874   | 1.61683  | 198526 | 15865.9 | 0.257759 |
| 15874.3 | 1.71182  | 198504 | 15866.2 | 0.282347 |
| 15874.6 | 1.80512  | 198490 | 15866.5 | 0.297759 |
| 15874.9 | 1.87822  | 198392 | 15866.8 | 0.311204 |
| 15875.2 | 1.95403  | 198398 | 15867.1 | 0.32579  |
| 15875.5 | 2.00499  | 198386 | 15867.4 | 0.332922 |
| 15875.8 | 2.05088  | 198366 | 15867.7 | 0.364615 |
| 15876.1 | 2.08187  | 198336 | 15868   | 0.373902 |
| 15876.4 | 2.1019   | 198234 | 15868.3 | 0.391167 |
| 15876.7 | 2.09586  | 198272 | 15868.6 | 0.418442 |
| 15877   | 2.07775  | 198192 | 15868.9 | 0.444014 |
| 15877.3 | 2.05274  | 198174 | 15869.2 | 0.468272 |
| 15877.6 | 2.01335  | 198124 | 15869.5 | 0.505663 |
| 15877.9 | 1.96665  | 198116 | 15869.8 | 0.534643 |
| 15878.2 | 1.91185  | 198038 | 15870.1 | 0.563189 |
| 15878.5 | 1.84761  | 197994 | 15870.4 | 0.600309 |
| 15878.8 | 1.78792  | 198004 | 15870.7 | 0.644693 |
| 15879.1 | 1.72418  | 197870 | 15871   | 0.693016 |
| 15879.4 | 1.65773  | 197818 | 15871.3 | 0.738124 |
| 15879.7 | 1.59431  | 197778 | 15871.6 | 0.799906 |
| 15880   | 1.53307  | 197786 | 15871.9 | 0.856546 |
| 15880.3 | 1.48629  | 197634 | 15872.2 | 0.911189 |
| 15880.6 | 1.42757  | 197602 | 15872.5 | 0.979106 |
| 15880.9 | 1.37777  | 197476 | 15872.8 | 1.04646  |

|         |          |        |         |          |
|---------|----------|--------|---------|----------|
| 15881.2 | 1.34234  | 197438 | 15873.1 | 1.12206  |
| 15881.5 | 1.29955  | 197324 | 15873.4 | 1.20635  |
| 15881.8 | 1.26978  | 197158 | 15873.7 | 1.28292  |
| 15882.1 | 1.23355  | 197008 | 15874   | 1.37237  |
| 15882.4 | 1.20357  | 196802 | 15874.3 | 1.46361  |
| 15882.7 | 1.17662  | 196488 | 15874.6 | 1.54199  |
| 15883   | 1.14998  | 196152 | 15874.9 | 1.61979  |
| 15883.3 | 1.12899  | 195606 | 15875.2 | 1.69307  |
| 15883.6 | 1.11435  | 194858 | 15875.5 | 1.7657   |
| 15883.9 | 1.09275  | 194064 | 15875.8 | 1.82726  |
| 15884.2 | 1.08481  | 193148 | 15876.1 | 1.87019  |
| 15884.5 | 1.07244  | 192136 | 15876.4 | 1.91128  |
| 15884.8 | 1.06675  | 191022 | 15876.7 | 1.93892  |
| 15885.1 | 1.0573   | 190126 | 15877   | 1.96516  |
| 15885.4 | 1.048    | 189308 | 15877.3 | 1.96008  |
| 15885.7 | 1.04164  | 188612 | 15877.6 | 1.9598   |
| 15886   | 1.03991  | 188142 | 15877.9 | 1.94307  |
| 15886.3 | 1.03169  | 187886 | 15878.2 | 1.91039  |
| 15886.6 | 1.02195  | 187944 | 15878.5 | 1.87986  |
| 15886.9 | 1.0116   | 188204 | 15878.8 | 1.83805  |
| 15887.2 | 0.998433 | 189056 | 15879.1 | 1.79247  |
| 15887.5 | 0.989153 | 190630 | 15879.4 | 1.73372  |
| 15887.8 | 0.979115 | 192342 | 15879.7 | 1.68352  |
| 15888.1 | 0.961065 | 193654 | 15880   | 1.62271  |
| 15888.4 | 0.945955 | 194824 | 15880.3 | 1.57288  |
| 15888.7 | 0.937088 | 196060 | 15880.6 | 1.51181  |
| 15889   | 0.931649 | 197104 | 15880.9 | 1.46134  |
| 15889.3 | 0.917008 | 198060 | 15881.2 | 1.42371  |
| 15889.6 | 0.912249 | 198862 | 15881.5 | 1.37603  |
| 15889.9 | 0.899681 | 199452 | 15881.7 | 1.35138  |
| 15890.2 | 0.897366 | 199912 | 15882.1 | 1.30016  |
| 15890.5 | 0.889919 | 200106 | 15882.7 | 1.22999  |
| 15890.8 | 0.882192 | 200178 | 15883.4 | 1.16411  |
| 15891.1 | 0.883125 | 200194 | 15884   | 1.10893  |
| 15891.4 | 0.881972 | 200198 | 15884.7 | 1.06424  |
| 15891.7 | 0.880456 | 200162 | 15885.4 | 1.03292  |
| 15892   | 0.887905 | 200138 | 15886.2 | 0.99853  |
| 15892.3 | 0.872148 | 200128 | 15886.9 | 0.973058 |
| 15892.6 | 0.883207 | 200044 | 15887.7 | 0.950072 |
| 15892.9 | 0.883671 | 200040 | 15888.5 | 0.935009 |
| 15893.2 | 0.887337 | 200042 | 15889.3 | 0.917605 |
| 15893.5 | 0.882274 | 200050 | 15890.1 | 0.915994 |
| 15893.8 | 0.890446 | 199956 | 15891   | 0.905829 |
| 15894.1 | 0.887931 | 199966 | 15891.9 | 0.900889 |
| 15894.4 | 0.887852 | 199950 | 15892.7 | 0.903697 |

|         |          |        |         |          |
|---------|----------|--------|---------|----------|
| 15894.7 | 0.899574 | 199870 | 15893.6 | 0.903696 |
| 15895   | 0.901476 | 199866 | 15894.6 | 0.919036 |
| 15895.3 | 0.905485 | 199814 | 15895.5 | 0.927948 |
| 15895.6 | 0.907196 | 199778 | 15896.5 | 0.928003 |
| 15895.9 | 0.912159 | 199752 | 15897.4 | 0.930869 |
| 15896.2 | 0.921233 | 199696 | 15898.5 | 0.940468 |
| 15896.5 | 0.922106 | 199690 | 15899.5 | 0.959485 |
| 15896.8 | 0.930743 | 199684 | 15900.5 | 0.994897 |
| 15897.1 | 0.934266 | 199610 | 15901.6 | 1.0297   |
| 15897.4 | 0.944674 | 199590 | 15902.6 | 1.05608  |
| 15897.7 | 0.948485 | 199594 | 15903.7 | 1.06534  |
| 15898   | 0.954513 | 199598 | 15904.9 | 1.07977  |
| 15898.3 | 0.968139 | 199524 | 15906   | 1.09755  |
| 15898.6 | 0.978476 | 199520 | 15907.1 | 1.10955  |
| 15898.9 | 0.985823 | 199506 | 15908.3 | 1.10649  |
| 15899.2 | 0.989999 | 199454 | 15909.5 | 1.10575  |
| 15899.5 | 0.997413 | 199486 | 15910.7 | 1.08611  |
| 15899.8 | 1.00819  | 199430 | 15911.9 | 1.08008  |
| 15900   | 1.02317  | 199394 | 15913.2 | 1.05921  |
| 15901.1 | 1.0466   | 199345 | 15914.4 | 1.04272  |
| 15902.2 | 1.07467  | 199536 | 15915.7 | 1.02506  |
| 15903.3 | 1.1045   | 199742 | 15917   | 1.0138   |
| 15904.4 | 1.12439  | 200114 | 15918.4 | 0.999323 |
| 15905.5 | 1.13675  | 200613 | 15919.7 | 0.985117 |
| 15906.7 | 1.13859  | 201231 | 15921.1 | 0.967585 |
| 15907.9 | 1.13482  | 201956 | 15922.4 | 0.954466 |
| 15909.1 | 1.12563  | 202820 | 15923.9 | 0.952153 |
| 15910.3 | 1.11855  | 203822 | 15925.3 | 0.948975 |
| 15911.6 | 1.09978  | 204865 | 15926.7 | 0.945648 |
| 15912.8 | 1.07692  | 206026 | 15928.2 | 0.934617 |
| 15914.1 | 1.05128  | 207387 | 15929.6 | 0.931433 |
| 15915.4 | 1.03834  | 208840 | 15931.1 | 0.927763 |
| 15916.7 | 1.01908  | 210376 | 15932.6 | 0.939202 |
| 15918   | 0.999706 | 212044 | 15934.2 | 0.941291 |
| 15919.4 | 0.988257 | 213906 | 15935.7 | 0.949204 |
| 15920.7 | 0.970612 | 215817 | 15937.3 | 0.961592 |
| 15922.1 | 0.95445  | 217882 | 15938.9 | 0.966364 |
| 15923.5 | 0.954774 | 220019 | 15940.5 | 0.985733 |
| 15925   | 0.942822 | 222292 | 15942.1 | 0.997706 |
| 15926.4 | 0.939009 | 224664 | 15943.8 | 1.00843  |
| 15927.9 | 0.934146 | 227265 | 15945.5 | 1.01658  |
| 15929.3 | 0.936816 | 229889 | 15947.1 | 1.02318  |
| 15930.8 | 0.93321  | 232656 | 15948.8 | 1.02728  |
| 15932.4 | 0.940598 | 235502 | 15950.6 | 1.0356   |
| 15933.9 | 0.955377 | 238463 | 15952.3 | 1.03739  |



|         |          |        |         |          |
|---------|----------|--------|---------|----------|
| 15935.5 | 0.960437 | 241601 | 15954.1 | 1.03613  |
| 15937.1 | 0.971797 | 244853 | 15955.8 | 1.03764  |
| 15938.7 | 0.983884 | 248118 | 15957.7 | 1.03353  |
| 15940.3 | 0.998577 | 251568 | 15959.5 | 1.03415  |
| 15941.9 | 1.00833  | 255209 | 15961.3 | 1.02527  |
| 15943.6 | 1.01439  | 258879 | 15963.2 | 1.0158   |
| 15945.2 | 1.02483  | 262684 | 15965   | 1.01318  |
| 15946.9 | 1.03495  | 266559 | 15966.9 | 1.00993  |
| 15948.7 | 1.04445  | 270586 | 15968.9 | 1.00294  |
| 15950.4 | 1.0352   | 274798 | 15970.8 | 0.993078 |
| 15952.1 | 1.04624  | 279099 | 15972.7 | 0.993263 |
| 15953.9 | 1.049    | 283456 | 15974.7 | 0.987686 |
| 15955.7 | 1.04599  | 287978 | 15976.7 | 0.981822 |
| 15957.5 | 1.04829  | 292605 | 15978.7 | 0.975102 |
| 15959.3 | 1.0449   | 297281 | 15980.7 | 0.973733 |
| 15961.2 | 1.0421   | 301949 | 15982.8 | 0.97427  |
| 15963   | 1.03799  | 305968 | 15984.9 | 0.970731 |
| 15964.9 | 1.02878  | 311775 | 15986.9 | 0.976403 |
| 15966.8 | 1.02359  | 317455 | 15989   | 0.984394 |
| 15968.7 | 1.01885  | 322732 | 15991.2 | 0.982339 |
| 15970.7 | 1.00863  | 328179 | 15993.3 | 0.987827 |
| 15972.6 | 1.00633  | 333715 | 15995.5 | 0.996673 |
| 15974.6 | 0.99578  | 339356 | 15997.7 | 0.996104 |
| 15976.6 | 0.99145  | 345112 | 15999.9 | 1.00035  |
| 15978.6 | 0.980987 | 350921 | 16002.1 | 1.005    |
| 15980.7 | 0.976444 | 356907 | 16004.3 | 1.0071   |
| 15982.7 | 0.97627  | 362939 | 16006.6 | 1.00538  |
| 15984.8 | 0.973372 | 369199 | 16008.9 | 1.0069   |
| 15986.9 | 0.981889 | 375521 | 16011.1 | 1.0127   |
| 15989   | 0.984457 | 381820 | 16013.5 | 1.00671  |
| 15991.1 | 0.989228 | 388402 | 16015.8 | 1.00127  |
| 15993.3 | 0.993245 | 395019 | 16018.1 | 1.00151  |
| 15995.5 | 0.994121 | 401816 | 16020.5 | 0.999041 |
| 15997.7 | 1.00016  | 408744 | 16022.9 | 1.00059  |
| 15999.9 | 1.00669  | 415729 | 16025.3 | 0.996459 |
| 16002.1 | 1.00809  | 422753 | 16027.7 | 0.993259 |
| 16004.3 | 1.01109  | 429959 | 16030.2 | 0.99345  |
| 16006.6 | 1.01954  | 436094 | 16032.7 | 0.995667 |
| 16008.9 | 1.01839  | 444401 | 16035.1 | 0.987291 |
| 16011.2 | 1.02085  | 452320 | 16037.6 | 0.985078 |
| 16013.5 | 1.0184   | 459983 | 16040.2 | 0.985975 |
| 16015.8 | 1.01442  | 467782 | 16042.7 | 0.989682 |
| 16018.2 | 1.01205  | 475408 | 16045.3 | 0.989939 |
| 16020.6 | 1.01474  | 483459 | 16047.9 | 0.987285 |
| 16023   | 1.00928  | 491501 | 16050.5 | 0.993056 |

|         |          |        |         |          |
|---------|----------|--------|---------|----------|
| 16025.4 | 1.00923  | 499580 | 16053.1 | 0.989613 |
| 16027.8 | 1.00857  | 507847 | 16055.7 | 0.987951 |
| 16030.3 | 1.00252  | 516242 | 16058.4 | 0.991828 |
| 16032.8 | 1.00454  | 524132 | 16061.1 | 0.996611 |
| 16035.3 | 1.00456  | 533323 | 16063.8 | 0.99482  |
| 16037.8 | 0.99565  | 542171 | 16066.5 | 0.994814 |
| 16040.3 | 0.99818  | 550950 | 16069.2 | 0.99188  |
| 16042.9 | 0.998231 | 559517 | 16072   | 0.997017 |
| 16045.4 | 0.996878 | 568192 | 16074.7 | 0.99715  |
| 16048   | 0.993932 | 578139 | 16077.5 | 0.998034 |
| 16050.6 | 0.993524 | 587350 | 16080.3 | 1.0015   |
| 16053.3 | 0.996089 | 596736 | 16083.2 | 0.998354 |
| 16055.9 | 1.00118  | 606175 | 16086   | 0.998911 |
| 16058.6 | 0.998707 | 615695 | 16088.9 | 0.997678 |
| 16061.3 | 1.00063  | 625360 | 16091.8 | 1.00072  |
| 16064   | 1.00061  | 634788 | 16094.7 | 0.999236 |
| 16066.7 | 0.997434 | 644817 | 16097.6 | 1.00091  |
| 16069.4 | 1.00083  | 654903 | 16100.5 | 0.999155 |
| 16072.2 | 1.00111  | 669222 | 16103.5 | 0.996797 |
| 16075   | 1.00248  | 682433 | 16106.5 | 0.997634 |
| 16077.8 | 1.00656  | 692456 | 16109.5 | 0.995696 |
| 16080.6 | 1.0057   | 703384 | 16112.5 | 0.995925 |
| 16083.4 | 1.00498  | 713835 | 16115.5 | 1.00352  |
| 16086.3 | 1.00533  | 724400 | 16118.6 | 1.01871  |
| 16089.2 | 1.0077   | 735368 | 16121.7 | 0.998755 |
| 16092   | 1.00679  | 746330 | 16124.8 | 0.999906 |
| 16094.9 | 1.01031  | 757180 | 16127.9 | 0.995928 |
| 16097.9 | 1.01178  | 768279 | 16131   | 0.99571  |
| 16100.8 | 1.01229  | 779042 | 16134.2 | 0.995803 |
| 16103.8 | 1.01014  | 789097 | 16137.3 | 0.998014 |
| 16106.8 | 1.00371  | 802019 | 16140.5 | 0.999868 |
| 16109.8 | 1.00124  | 813379 | 16143.7 | 1.00034  |
| 16112.8 | 0.999656 | 824959 | 16147   | 1.00499  |
| 16115.9 | 0.997431 | 836247 | 16150.2 | 1.01665  |
| 16118.9 | 0.997675 | 847512 | 16153.5 | 0.99548  |
| 16122   | 1.00045  | 857936 | 16156.8 | 0.998428 |
| 16131.4 | 0.994583 | 856519 | 16160.1 | 0.995602 |
| 16134.6 | 0.994224 | 841321 | 16163.4 | 0.998342 |
| 16144.1 | 0.99613  | 894717 | 16166.7 | 1.00013  |
| 16153.9 | 0.999497 | 908767 | 16170.1 | 0.996105 |
| 16157.2 | 0.992884 | 920992 | 16173.5 | 0.999655 |
| 16160.5 | 0.99502  | 934555 | 16176.9 | 0.995148 |
| 16163.8 | 0.996421 | 946088 | 16180.3 | 0.996409 |
| 16167.2 | 1.0009   | 948718 | 16183.7 | 1.00065  |
| 16170.6 | 0.99679  | 966179 | 16187.2 | 1.00018  |

|         |          |          |         |          |
|---------|----------|----------|---------|----------|
| 16184.2 | 0.996118 | 984040   | 16190.7 | 1.00108  |
| 16187.7 | 0.993393 | 997186   | 16194.2 | 0.998615 |
| 16191.2 | 0.998547 | 1.01E+06 | 16197.7 | 0.999816 |
| 16194.7 | 0.999475 | 1.02E+06 | 16201.2 | 1.0023   |
| 16198.2 | 0.998876 | 1.04E+06 | 16204.8 | 1.00423  |
| 16201.7 | 0.999219 | 1.05E+06 | 16208.4 | 1.00173  |
| 16205.3 | 0.997731 | 1.06E+06 | 16211.9 | 0.999884 |
| 16208.9 | 0.995475 | 1.08E+06 | 16215.5 | 1.00107  |
| 16212.5 | 0.996489 | 1.09E+06 | 16219.2 | 0.998311 |
| 16216.1 | 0.997963 | 1.10E+06 | 16222.8 | 1.00471  |
| 16219.8 | 1.00042  | 1.12E+06 | 16226.5 | 1.00279  |
| 16223.4 | 1.00014  | 1.13E+06 | 16230.2 | 1.00057  |
| 16227.1 | 0.999533 | 1.14E+06 | 16233.9 | 1.00347  |
| 16230.8 | 0.997029 | 1.16E+06 | 16237.6 | 0.997857 |
| 16234.5 | 0.996075 | 1.17E+06 | 16241.4 | 1.0007   |
| 16238.2 | 0.998146 | 1.18E+06 | 16245.1 | 0.999629 |
| 16242   | 1.00017  | 1.20E+06 | 16248.9 | 1.00587  |
| 16245.7 | 0.998827 | 1.21E+06 | 16252.7 | 1.00203  |
| 16249.5 | 0.99808  | 1.23E+06 | 16256.5 | 1.00042  |
| 16253.3 | 0.999444 | 1.24E+06 | 16260.4 | 1.00722  |
| 16257.2 | 0.998332 | 1.26E+06 | 16264.2 | 1.00386  |
| 16261   | 0.999272 | 1.27E+06 | 16268.1 | 1.00564  |
| 16264.9 | 0.998749 | 1.29E+06 | 16272   | 1.00387  |
| 16268.7 | 0.999632 | 1.30E+06 | 16275.9 | 1.00518  |
| 16272.7 | 0.996968 | 1.33E+06 | 16279.8 | 1.00101  |
| 16276.6 | 1.00053  | 1.34E+06 | 16283.8 | 1.00667  |
| 16280.5 | 0.998457 | 1.36E+06 | 16287.7 | 1.00424  |
| 16284.5 | 0.996801 | 1.37E+06 | 16291.7 | 1.00756  |
| 16288.5 | 0.997507 | 1.39E+06 | 16295.8 | 1.00633  |
| 16292.5 | 0.997463 | 1.40E+06 | 16299.8 | 1.00909  |
| 16296.5 | 0.997712 | 1.42E+06 | 16303.8 | 1.00611  |
| 16300.5 | 0.99686  | 1.43E+06 | 16307.9 | 1.00368  |
| 16304.6 | 0.992447 | 1.45E+06 | 16312   | 1.00598  |
| 16308.6 | 0.998587 | 1.47E+06 | 16316.1 | 1.00318  |
| 16312.7 | 0.998862 | 1.48E+06 | 16320.2 | 1.00095  |
| 16316.9 | 0.998802 | 1.50E+06 | 16324.4 | 1.00121  |
| 16321   | 1.00034  | 1.51E+06 | 16328.5 | 1.00239  |
| 16325.1 | 1.00151  | 1.53E+06 | 16332.7 | 1.00086  |
| 16329.3 | 1.00123  | 1.55E+06 | 16336.9 | 1.00345  |
| 16333.5 | 1.00215  | 1.56E+06 | 16341.1 | 1.0046   |
| 16337.7 | 1.00189  | 1.58E+06 | 16345.4 | 0.999551 |
| 16341.9 | 1.00335  | 1.59E+06 | 16349.6 | 1.00329  |
| 16346.2 | 1.00144  | 1.61E+06 | 16353.9 | 0.999074 |
| 16350.4 | 1.00147  | 1.63E+06 | 16358.2 | 1.00044  |
| 16354.7 | 0.996822 | 1.64E+06 | 16362.5 | 1.00366  |

|         |          |          |         |          |
|---------|----------|----------|---------|----------|
| 16359   | 1.00141  | 1.66E+06 | 16366.8 | 1.00135  |
| 16363.3 | 1.00236  | 1.68E+06 | 16371.2 | 1.00034  |
| 16367.7 | 1.00094  | 1.69E+06 | 16375.6 | 1.0035   |
| 16372.1 | 0.998171 | 1.71E+06 | 16379.9 | 1.00164  |
| 16376.4 | 1.0019   | 1.72E+06 | 16384.4 | 0.998817 |
| 16380.8 | 0.999633 | 1.74E+06 | 16388.8 | 1.00204  |
| 16385.3 | 1.00051  | 1.76E+06 | 16393.2 | 1.0024   |
| 16389.7 | 1.00382  | 1.77E+06 | 16397.7 | 1.00118  |
| 16394.1 | 0.999975 | 1.79E+06 | 16402.2 | 1.00038  |
| 16398.6 | 1.00012  | 1.81E+06 | 16406.7 | 1.00316  |
| 16403.1 | 1.00305  | 1.82E+06 | 16411.2 | 1.00375  |
| 16407.6 | 0.999617 | 1.86E+06 | 16415.8 | 1.00346  |
| 16412.1 | 1.00018  | 1.88E+06 | 16420.3 | 1.00103  |
| 16416.7 | 0.998219 | 1.90E+06 | 16424.9 | 0.999073 |
| 16421.3 | 1.00256  | 1.91E+06 | 16429.5 | 0.998155 |
| 16425.9 | 1.00246  | 1.93E+06 | 16434.1 | 0.999339 |
| 16430.5 | 0.999987 | 1.95E+06 | 16438.8 | 0.996367 |
| 16435.1 | 0.997772 | 1.97E+06 | 16443.4 | 0.996651 |
| 16439.7 | 1.00231  | 1.98E+06 | 16448.1 | 1.00094  |
| 16444.4 | 0.998366 | 2.00E+06 | 16452.8 | 0.995714 |
| 16449.1 | 0.999934 | 2.02E+06 | 16457.5 | 0.998956 |
| 16453.8 | 0.998313 | 2.04E+06 | 16462.3 | 0.996541 |
| 16458.5 | 0.9984   | 2.06E+06 | 16467   | 0.997164 |
| 16463.3 | 1.00084  | 2.07E+06 | 16471.8 | 0.994061 |
| 16468   | 0.997955 | 2.09E+06 | 16476.6 | 0.993671 |
| 16477.6 | 0.998493 | 2.11E+06 | 16481.4 | 0.998907 |
| 16482.4 | 1        | 2.13E+06 | 16486.2 | 0.993523 |
| 16487.2 | 0.999043 | 2.15E+06 | 16491   | 0.995576 |
| 16497   | 1.00292  | 2.17E+06 | 16495.9 | 0.997675 |
| 16501.9 | 1.00102  | 2.18E+06 | 16500.8 | 0.998642 |
| 16506.8 | 1.00153  | 2.20E+06 | 16505.7 | 0.996099 |
| 16511.7 | 1.00113  | 2.22E+06 | 16510.6 | 0.998693 |
| 16516.7 | 0.997742 | 2.24E+06 | 16515.6 | 0.996312 |
| 16521.6 | 1.00033  | 2.26E+06 | 16520.5 | 1.00005  |
| 16526.6 | 0.998714 | 2.28E+06 | 16525.5 | 0.998591 |
| 16531.6 | 1.00012  | 2.30E+06 | 16530.5 | 0.996874 |
| 16536.7 | 1.00772  | 2.34E+06 | 16535.5 | 1.00038  |
| 16541.7 | 0.996446 | 2.36E+06 | 16540.6 | 0.994464 |
